# Supplementary material for: The simple multivariable model for predicting liver fibrosis in Vietnamese male adults: a combination of Bayesian model averaging and stepwise method
Source: PeerJ. 2026 Jan 14;14:e20435. doi: 10.7717/peerj.20435 (PMC12811970; doi:10.7717/peerj.20435)
Supplement: Supplemental Information 1 — Patient identifiers, the variables used in the model—age, alcohol abuse, hepatitis B, hepatitis C, family history of cirrhosis, hepatic steatosis—and the liver fibrosis stage classified according to the METAVIR system [file peerj-14-20435-s001.xlsx]

## Sheet: Xogan_BSHung
No.	Age	BMI	Family's cirhossis history	Hepatitis B	Hepatitis C	Hepatitis B virus vaccinated	Alcohol abuse	Hepatic steatosis	Metavir
1	53	35	No	No	No	No	No	Yes	F0
2	56	24	Yes	No	No	No	Yes	No	F0
3	56	24	No	No	No	No	Yes	No	F0
4	59	23	No	No	No	No	Yes	Yes	F0
5	55	24	No	No	No	No	Yes	Yes	F0
6	55	24	No	No	No	No	No	No	F0
7	55	29	No	No	No	No	No	No	F0
8	49	27	No	No	No	No	Yes	No	F0
9	50	26	No	No	No	No	Yes	No	F1
10	52	26	No	Yes	No	No	No	No	F1
11	55	29	No	No	No	No	Yes	Yes	F0
12	58	21	No	No	No	No	No	No	F0
13	55	30	No	No	No	No	Yes	Yes	F1
14	50	24	No	No	No	No	Yes	No	F0
15	58	22	No	No	No	No	Yes	No	F0
16	56	26	No	No	No	No	No	No	F0
17	54	22	No	No	No	No	Yes	Yes	F0
18	48	24	No	No	No	No	No	No	F0
19	51	24	No	No	No	No	Yes	No	F3
20	55	25	Yes	No	No	No	Yes	Yes	F2
21	45	31	No	No	No	Yes	No	No	F0
22	55	22	No	No	No	No	No	No	F0
23	54	29	No	No	No	No	No	No	F0
24	49	29	No	No	No	No	Yes	Yes	F1
25	58	32	No	No	No	No	Yes	Yes	F1
26	56	25	No	No	No	No	No	No	F0
27	54	27	No	No	No	No	Yes	No	F0
28	58	29	No	No	No	No	Yes	Yes	F0
29	58	35	No	No	No	No	Yes	Yes	F1
30	48	25	No	No	No	No	Yes	No	F0
31	52	24	No	Yes	No	No	Yes	No	F0
32	58	25	No	No	No	No	No	No	F0
33	58	33	No	No	No	No	No	Yes	F0
34	56	24	No	No	No	No	Yes	Yes	F0
35	46	25	No	No	No	Yes	No	No	F0
36	57	24	No	No	No	No	No	No	F0
37	57	20	No	No	No	No	No	No	F0
38	51	28	No	No	No	No	Yes	Yes	F0
39	53	24	No	No	No	No	No	No	F0
40	57	24	No	No	No	No	Yes	No	F0
41	50	28	No	No	No	Yes	Yes	No	F0
42	54	23	Yes	No	No	Yes	No	Yes	F0
43	57	26	No	No	No	No	Yes	No	F1
44	53	24	No	No	No	No	Yes	No	F0
45	56	26	No	No	No	No	Yes	No	F0
46	51	28	No	No	No	No	Yes	Yes	F0
47	55	27	No	No	No	No	Yes	No	F0
48	56	22	No	Yes	No	No	No	No	F0
49	49	28	No	No	No	No	Yes	Yes	F0
50	58	23	No	Yes	No	No	No	No	F0
51	53	22	No	No	No	No	Yes	No	F0
52	54	22	No	No	No	No	No	No	F0
53	58	23	No	No	No	No	Yes	No	F1
54	55	25	No	No	Yes	No	Yes	No	F0
55	56	20	No	No	No	No	Yes	Yes	F1
56	52	26	Yes	No	No	No	Yes	Yes	F0
57	53	22	No	Yes	No	No	No	No	F0
58	58	30	No	No	No	No	Yes	No	F0
59	55	26	No	Yes	No	No	Yes	No	F0
60	57	25	Yes	No	No	No	Yes	No	F0
61	57	23	No	No	No	No	No	Yes	F0
62	54	26	No	No	No	No	Yes	Yes	F2
63	57	26	No	No	No	No	Yes	No	F1
64	55	23	No	Yes	No	No	No	No	F0
65	55	27	No	No	No	No	No	Yes	F0
66	55	23	No	No	No	No	No	No	F0
67	50	24	No	No	No	No	Yes	No	F0
68	53	27	No	No	No	No	Yes	Yes	F0
69	57	24	No	Yes	No	No	Yes	Yes	F1
70	51	25	No	No	No	Yes	Yes	Yes	F0
71	50	25	No	No	No	No	Yes	Yes	F1
72	53	26	No	No	No	No	No	No	F0
73	57	26	No	No	No	No	Yes	Yes	F1
74	55	26	No	No	No	No	No	No	F0
75	53	28	No	No	No	No	Yes	Yes	F1
76	53	26	No	No	No	No	Yes	No	F0
77	58	25	No	No	No	No	No	Yes	F0
78	58	25	No	No	No	No	No	Yes	F0
79	58	22	No	No	No	No	No	Yes	F0
80	54	26	No	No	No	No	Yes	No	F0
81	57	27	No	No	No	No	Yes	No	F0
82	53	33	No	No	No	No	Yes	Yes	F0
83	56	21	No	No	No	No	Yes	No	F0
84	53	26	No	No	No	No	No	Yes	F0
85	51	25	No	No	No	No	Yes	No	F0
86	52	24	No	Yes	No	No	No	No	F0
87	54	23	No	No	No	No	Yes	No	F0
88	48	28	No	No	No	No	No	Yes	F0
89	56	25	No	No	No	No	No	No	F0
90	55	23	No	No	No	No	No	No	F0
91	55	22	No	No	No	No	Yes	No	F0
92	48	24	No	No	No	No	Yes	No	F0
93	55	22	No	No	No	No	Yes	No	F0
94	57	27	No	No	No	No	No	Yes	F0
95	57	23	No	No	No	No	Yes	Yes	F0
96	58	23	No	No	No	No	Yes	No	F0
97	52	25	No	No	No	Yes	Yes	No	F0
98	54	19	No	No	No	No	Yes	No	F0
99	53	26	No	No	No	No	Yes	No	F0
100	55	27	No	No	No	No	Yes	No	F0
101	54	24	No	No	No	Yes	Yes	No	F0
102	53	24	No	No	No	No	Yes	Yes	F3
103	51	24	Yes	No	No	No	Yes	No	F0
104	55	21	No	No	No	No	Yes	No	F1
105	49	29	No	No	No	No	Yes	No	F0
106	48	27	No	No	No	No	Yes	No	F0
107	53	29	No	No	No	No	Yes	Yes	F0
108	54	25	No	No	No	No	Yes	Yes	F0
109	55	26	No	No	No	No	No	Yes	F1
110	54	26	No	No	Yes	No	Yes	No	F3
111	55	24	No	No	No	No	Yes	Yes	F0
112	55	25	No	No	No	No	No	No	F0
113	50	25	No	No	No	No	Yes	No	F0
114	53	30	No	No	No	No	Yes	Yes	F1
115	57	24	No	No	No	No	No	Yes	F0
116	53	24	No	No	No	No	No	No	F0
117	58	29	No	No	No	No	Yes	Yes	F1
118	54	26	No	No	No	Yes	Yes	Yes	F0
119	55	22	No	No	No	No	Yes	Yes	F1
120	56	22	No	No	No	No	No	Yes	F0
121	56	24	No	Yes	No	No	Yes	No	F0
122	57	28	No	No	No	No	No	Yes	F0
123	56	24	No	No	No	No	Yes	No	F0
124	56	22	No	No	No	No	Yes	No	F0
125	49	22	No	No	No	No	No	No	F0
126	58	24	No	No	No	No	Yes	No	F0
127	48	22	No	No	No	No	Yes	No	F0
128	51	24	No	Yes	No	No	Yes	No	F0
129	53	26	No	No	No	No	No	Yes	F0
130	54	29	No	No	No	No	Yes	Yes	F0
131	54	20	No	Yes	No	No	No	No	F0
132	51	24	No	No	No	No	Yes	No	F0
133	56	25	No	Yes	No	No	No	No	F1
134	56	23	No	No	No	No	No	No	F0
135	58	26	No	No	No	No	Yes	No	F0
136	51	25	No	Yes	No	No	Yes	No	F1
137	51	26	No	No	No	No	No	No	F0
138	55	25	No	No	No	No	No	No	F0
139	49	29	No	No	No	Yes	Yes	No	F0
140	51	25	No	No	No	No	Yes	No	F0
141	50	23	No	No	No	Yes	Yes	Yes	F0
142	50	29	No	No	No	Yes	Yes	Yes	F0
143	58	34	No	No	No	No	Yes	No	F0
144	52	26	No	No	No	No	Yes	No	F0
145	58	27	No	No	No	No	No	No	F0
146	57	25	No	No	No	No	Yes	Yes	F0
147	56	23	No	No	No	No	Yes	No	F0
148	56	27	No	No	No	No	Yes	Yes	F0
149	56	26	No	No	No	No	Yes	No	F0
150	57	29	No	No	No	No	Yes	No	F1
151	52	24	No	No	No	Yes	No	No	F0
152	56	28	No	No	No	No	No	Yes	F0
153	52	29	No	No	No	No	Yes	Yes	F1
154	52	26	No	No	No	No	Yes	Yes	F1
155	60	26	No	No	No	No	Yes	Yes	F0
156	53	29	No	No	No	No	Yes	No	F0
157	51	26	No	No	No	No	Yes	Yes	F0
158	52	23	No	No	No	No	Yes	No	F0
159	47	27	No	No	No	No	Yes	Yes	F0
160	53	24	No	No	No	No	No	Yes	F1
161	50	23	No	No	No	No	Yes	No	F0
162	58	22	No	No	No	No	No	No	F0
163	55	20	No	No	No	No	No	No	F0
164	52	28	No	No	No	No	Yes	Yes	F0
165	57	26	No	No	No	No	Yes	No	F0
166	48	29	No	No	No	No	No	Yes	F1
167	54	29	No	No	No	No	Yes	Yes	F0
168	55	25	No	No	No	No	Yes	Yes	F0
169	57	26	No	No	No	No	Yes	Yes	F0
170	55	27	No	No	No	No	Yes	No	F0
171	55	26	No	No	No	No	No	Yes	F0
172	56	20	No	No	No	No	Yes	No	F0
173	54	26	No	No	No	No	Yes	Yes	F1
174	58	27	No	No	No	No	Yes	No	F0
175	55	20	No	No	No	No	No	No	F0
176	57	25	No	No	No	No	Yes	No	F1
177	56	29	No	No	No	No	Yes	Yes	F0
178	55	28	No	No	No	No	Yes	No	F0
179	57	23	No	No	No	No	Yes	Yes	F0
180	57	21	No	No	No	No	No	No	F0
181	53	24	No	No	No	No	Yes	No	F0
182	58	26	No	No	No	No	Yes	No	F0
183	55	24	No	No	No	No	Yes	No	F0
184	57	23	No	No	No	No	No	No	F0
185	53	24	No	No	No	No	Yes	No	F0
186	57	24	No	No	No	No	Yes	No	F0
187	56	24	No	No	No	No	No	Yes	F0
188	58	22	No	No	No	No	No	No	F0
189	57	27	No	No	No	No	No	No	F0
190	49	25	No	No	No	Yes	Yes	No	F0
191	49	26	No	No	No	No	Yes	No	F2
192	53	26	No	No	No	Yes	No	No	F0
193	57	33	No	No	No	No	Yes	Yes	F0
194	58	24	No	No	No	No	Yes	No	F0
195	52	28	No	No	No	No	Yes	Yes	F1
196	57	27	No	No	No	No	Yes	Yes	F1
197	55	27	No	No	No	No	Yes	Yes	F1
198	53	24	No	No	No	Yes	Yes	No	F1
199	52	25	No	Yes	No	No	Yes	Yes	F0
200	55	26	No	No	No	No	Yes	No	F0
201	54	26	No	No	No	No	No	No	F0
202	54	24	No	No	No	No	No	No	F0
203	56	25	No	No	No	No	No	Yes	F0
204	52	26	No	No	No	No	No	No	F0
205	56	21	No	No	No	No	No	No	F0
206	57	23	No	No	No	No	Yes	No	F0
207	57	21	No	No	No	No	Yes	No	F0
208	54	23	No	No	No	No	No	No	F0
209	55	24	No	No	No	No	No	No	F0
210	56	21	No	No	No	No	Yes	No	F0
211	55	23	No	Yes	No	No	No	No	F0
212	57	27	No	No	No	No	No	Yes	F0
213	57	25	No	No	No	No	No	No	F0
214	54	26	No	No	No	No	Yes	Yes	F1
215	50	28	No	Yes	No	No	No	No	F1
216	57	22	No	No	No	No	Yes	Yes	F0
217	50	25	No	No	No	No	No	No	F0
218	50	24	No	No	No	No	Yes	No	F0
219	53	25	No	No	No	No	Yes	No	F0
220	49	26	No	No	No	No	Yes	No	F0
221	48	30	No	No	No	No	Yes	No	F0
222	47	25	No	No	No	No	Yes	No	F0
223	52	27	No	No	No	No	Yes	Yes	F1
224	54	22	No	Yes	No	No	No	No	F0
225	58	26	No	No	No	No	No	Yes	F0
226	51	24	No	No	No	No	Yes	Yes	F0
227	57	27	No	No	Yes	No	No	No	F0
228	54	24	No	No	No	No	Yes	Yes	F1
229	51	27	No	No	No	No	Yes	Yes	F0
230	58	24	No	No	No	No	No	No	F0
231	54	24	No	No	No	No	No	No	F0
232	55	26	No	No	No	No	No	Yes	F0
233	53	26	No	No	No	No	Yes	No	F0
234	53	24	No	No	No	No	No	No	F0
235	57	24	No	Yes	No	No	No	No	F1
236	53	24	No	No	No	No	No	No	F0
237	54	19	No	No	No	No	No	No	F0
238	49	30	No	No	No	No	Yes	Yes	F0
239	57	30	No	No	No	No	Yes	Yes	F0
240	53	26	No	No	No	No	No	No	F0
241	52	26	No	No	No	No	Yes	No	F0
242	55	29	No	No	No	No	Yes	Yes	F1
243	58	25	No	No	No	No	Yes	Yes	F0
244	51	27	No	No	No	No	Yes	Yes	F0
245	56	23	No	No	No	No	No	Yes	F0
246	54	24	No	No	No	No	No	Yes	F0
247	52	26	No	No	No	No	Yes	Yes	F0
248	49	24	No	No	No	Yes	No	No	F0
249	49	23	No	No	No	No	Yes	No	F0
250	52	25	No	No	No	No	Yes	No	F0
251	44	24	No	No	No	No	Yes	Yes	F0
252	51	25	No	No	No	No	Yes	Yes	F0
253	55	27	No	No	No	No	No	Yes	F1
254	48	24	No	No	No	No	Yes	Yes	F0
255	53	28	No	No	No	No	Yes	Yes	F0
256	52	23	No	Yes	No	No	No	No	F0
257	51	22	No	No	No	No	Yes	No	F0
258	51	29	No	No	No	No	Yes	No	F0
259	51	22	No	No	No	No	No	No	F0
260	51	22	No	No	No	No	Yes	No	F0
261	55	33	No	No	No	No	Yes	Yes	F0
262	51	27	No	No	No	No	No	Yes	F3
263	48	28	No	No	No	No	Yes	Yes	F0
264	53	23	No	No	No	No	Yes	No	F0
265	51	20	No	Yes	No	No	No	Yes	F2
266	49	27	No	No	No	No	No	No	F0
267	52	25	No	No	No	No	Yes	Yes	F1
268	54	27	No	No	No	No	No	Yes	F0
269	49	27	No	No	No	No	Yes	Yes	F0
270	54	24	No	No	Yes	No	No	Yes	F4
271	55	33	No	No	No	No	Yes	Yes	F2
272	52	28	No	No	No	No	No	Yes	F1
273	53	27	No	No	No	No	Yes	Yes	F0
274	49	25	No	No	No	No	No	No	F0
275	50	25	No	No	No	No	Yes	No	F0
276	51	26	No	No	No	No	Yes	No	F0
277	49	24	No	No	No	No	No	No	F0
278	55	26	No	No	No	No	No	No	F0
279	53	26	No	No	No	No	No	Yes	F0
280	49	21	No	No	No	No	Yes	No	F0
281	50	23	No	No	No	No	Yes	Yes	F1
282	45	28	Yes	No	No	No	Yes	Yes	F0
283	56	25	No	No	No	No	No	No	F0
284	48	27	No	No	No	No	No	Yes	F0
285	48	25	No	No	No	No	Yes	No	F0
286	48	24	No	No	No	No	Yes	No	F0
287	47	30	No	No	No	No	No	Yes	F1
288	52	26	No	Yes	No	No	No	Yes	F0
289	49	26	No	No	No	No	Yes	No	F0
290	49	23	No	No	No	No	No	No	F0
291	54	18	No	No	No	No	No	No	F0
292	48	24	No	No	No	No	No	No	F0
293	55	33	No	No	No	No	No	Yes	F1
294	49	22	No	No	No	No	Yes	No	F0
295	48	28	No	No	No	No	Yes	Yes	F0
296	52	29	No	No	No	No	No	No	F0
297	50	26	No	No	No	No	Yes	Yes	F0
298	49	27	No	No	No	No	Yes	Yes	F0
299	46	24	No	No	No	Yes	Yes	Yes	F0
300	52	26	No	No	No	No	Yes	Yes	F0
301	50	25	No	Yes	No	No	No	No	F0
302	54	19	No	No	No	No	Yes	No	F2
303	50	26	No	No	No	No	Yes	No	F0
304	48	30	No	No	No	No	No	Yes	F1
305	45	25	No	No	No	Yes	No	Yes	F0
306	44	23	No	No	No	Yes	Yes	No	F0
307	50	26	No	No	No	No	Yes	No	F0
308	54	25	No	No	No	No	Yes	No	F1
309	53	23	No	No	No	No	No	No	F0
310	52	26	No	No	No	No	Yes	Yes	F1
311	54	22	No	No	No	No	No	Yes	F1
312	50	22	No	No	No	No	No	No	F0
313	49	24	No	No	No	No	No	No	F0
314	48	30	No	No	No	No	No	Yes	F0
315	49	27	No	No	No	No	Yes	Yes	F1
316	49	24	No	No	No	No	No	No	F0
317	48	22	No	No	No	No	Yes	Yes	F1
318	51	28	No	No	No	No	No	No	F0
319	53	25	No	No	No	No	Yes	No	F0
320	47	23	No	No	No	No	Yes	No	F0
321	51	27	No	No	No	No	Yes	Yes	F0
322	54	23	No	No	No	No	No	Yes	F1
323	46	23	No	No	No	No	No	No	F0
324	51	23	No	No	No	No	No	No	F0
325	52	24	No	No	No	No	Yes	No	F0
326	50	24	No	No	No	No	No	No	F0
327	50	22	No	No	No	No	Yes	No	F1
328	47	26	No	No	No	No	Yes	No	F1
329	47	25	No	No	No	No	Yes	Yes	F0
330	43	22	No	No	No	Yes	Yes	Yes	F1
331	48	24	No	Yes	No	No	Yes	Yes	F3
332	54	25	Yes	No	No	No	Yes	Yes	F1
333	48	23	No	No	No	No	No	Yes	F0
334	52	22	No	No	No	No	No	No	F0
335	49	26	No	No	No	No	Yes	No	F0
336	55	21	No	No	No	No	No	No	F0
337	50	22	No	No	No	No	Yes	No	F0
338	49	32	No	No	No	No	Yes	Yes	F0
339	51	25	No	No	No	No	Yes	No	F0
340	46	24	No	No	No	No	Yes	No	F0
341	52	26	No	No	No	No	No	Yes	F0
342	48	24	No	No	No	No	Yes	No	F0
343	49	24	No	No	No	No	Yes	No	F0
344	55	20	No	No	No	No	No	No	F0
345	50	29	No	No	No	No	Yes	Yes	F0
346	49	29	No	No	No	No	No	Yes	F0
347	51	22	No	No	No	No	No	Yes	F0
348	49	26	No	No	No	No	Yes	No	F0
349	46	26	No	No	No	Yes	Yes	Yes	F0
350	51	24	No	No	No	No	No	No	F0
351	52	24	No	No	No	No	No	No	F0
352	53	23	No	No	No	No	Yes	Yes	F0
353	43	23	No	No	No	No	Yes	No	F0
354	46	23	No	No	No	No	Yes	No	F1
355	53	26	No	No	No	No	Yes	Yes	F0
356	45	26	No	No	No	No	Yes	Yes	F0
357	52	22	No	No	No	No	No	No	F0
358	54	28	No	No	No	No	No	Yes	F0
359	48	26	No	No	No	No	Yes	No	F0
360	50	24	No	No	No	No	Yes	No	F0
361	49	25	No	No	No	No	Yes	No	F0
362	48	21	No	No	No	No	Yes	No	F1
363	53	23	No	No	No	No	Yes	No	F0
364	42	27	No	No	No	No	Yes	Yes	F0
365	51	28	No	No	No	No	Yes	Yes	F1
366	44	28	No	No	No	No	Yes	No	F0
367	53	29	No	No	No	No	Yes	Yes	F1
368	52	20	No	No	No	No	No	No	F0
369	49	24	No	No	No	No	Yes	Yes	F0
370	49	28	No	No	No	No	Yes	Yes	F0
371	52	22	No	No	No	No	Yes	Yes	F1
372	52	20	No	No	No	No	Yes	No	F0
373	51	25	No	No	No	No	Yes	Yes	F0
374	53	24	No	No	No	No	No	No	F0
375	53	27	No	No	No	No	No	Yes	F0
376	51	22	No	No	No	No	Yes	No	F0
377	49	27	No	No	No	No	No	Yes	F0
378	47	25	No	No	No	No	No	No	F0
379	52	22	No	No	No	No	No	No	F0
380	53	22	No	No	No	No	Yes	No	F0
381	49	29	No	No	No	No	No	No	F0
382	50	26	No	No	No	Yes	No	Yes	F0
383	43	22	No	No	No	Yes	Yes	No	F0
384	49	25	No	No	No	No	No	No	F0
385	53	20	No	Yes	No	No	No	No	F1
386	53	28	Yes	No	No	No	No	No	F0
387	49	23	No	No	No	No	Yes	No	F4
388	47	25	No	No	No	No	No	No	F0
389	49	25	No	No	No	No	No	Yes	F0
390	50	23	No	No	No	No	No	No	F0
391	50	26	No	No	No	No	Yes	No	F0
392	46	21	No	Yes	No	No	Yes	No	F1
393	49	26	No	No	No	No	Yes	Yes	F0
394	53	27	No	No	No	No	No	No	F0
395	53	23	No	No	No	No	Yes	No	F1
396	47	28	No	No	No	No	Yes	Yes	F0
397	51	26	No	No	No	No	Yes	Yes	F3
398	48	24	Yes	No	No	No	Yes	Yes	F0
399	46	22	No	No	No	No	No	No	F0
400	47	25	No	No	No	No	Yes	No	F0
401	43	27	No	No	No	Yes	Yes	No	F1
402	51	26	No	No	No	No	Yes	Yes	F0
403	55	22	No	No	No	No	No	No	F0
404	53	27	No	No	No	No	No	Yes	F3
405	57	22	No	No	No	No	No	No	F0
406	51	30	No	Yes	No	No	No	No	F1
407	53	24	No	No	No	No	Yes	No	F1
408	50	24	No	No	No	No	Yes	No	F0
409	53	23	No	No	No	No	No	No	F0
410	48	25	No	No	No	No	No	Yes	F0
411	57	27	No	No	No	No	No	No	F0
412	54	25	No	No	No	No	No	No	F0
413	48	25	No	No	No	No	No	No	F0
414	49	25	No	No	No	No	No	No	F0
415	48	21	No	Yes	No	No	No	No	F1
416	49	27	No	No	No	No	Yes	Yes	F1
417	52	26	No	No	No	No	No	Yes	F1
418	51	27	No	No	No	No	No	No	F0
419	49	24	No	No	No	No	Yes	No	F1
420	47	26	No	No	No	No	Yes	Yes	F0
421	48	26	No	No	No	No	No	No	F0
422	52	26	No	No	No	No	No	Yes	F0
423	51	25	No	No	No	No	No	No	F0
424	50	22	No	No	No	No	No	No	F0
425	55	27	No	No	No	No	Yes	Yes	F1
426	52	23	Yes	No	No	No	No	Yes	F0
427	51	27	No	No	No	No	No	No	F0
428	54	27	No	No	No	No	No	Yes	F0
429	50	25	No	No	No	No	Yes	No	F0
430	52	30	No	No	No	No	No	Yes	F0
431	55	24	No	No	No	No	No	No	F0
432	52	25	No	No	No	No	No	Yes	F0
433	55	26	No	No	No	No	Yes	Yes	F0
434	52	32	No	Yes	No	No	No	Yes	F0
435	49	29	No	No	No	No	Yes	Yes	F1
436	49	23	No	No	No	No	No	No	F0
437	47	26	No	Yes	No	No	No	No	F0
438	52	24	No	No	No	No	No	Yes	F0
439	50	22	No	No	No	No	Yes	No	F0
440	53	25	No	No	No	No	Yes	No	F0
441	54	23	No	No	No	No	Yes	No	F1
442	52	26	No	No	No	No	Yes	No	F0
443	44	24	No	No	No	No	No	No	F0
444	51	21	No	No	No	No	No	No	F0
445	52	26	No	No	No	No	Yes	Yes	F0
446	52	25	No	No	No	No	Yes	No	F0
447	47	23	No	No	No	No	Yes	No	F0
448	49	25	No	No	No	No	Yes	No	F0
449	56	25	No	No	No	No	No	No	F0
450	52	29	No	No	No	No	Yes	Yes	F1
451	55	27	No	No	No	No	No	Yes	F1
452	53	24	No	No	No	No	Yes	No	F1
453	48	26	No	No	Yes	No	No	No	F2
454	49	26	Yes	No	No	No	Yes	No	F0
455	51	29	No	No	No	No	Yes	Yes	F1
456	50	24	No	No	No	No	Yes	No	F0
457	52	23	No	No	No	No	No	No	F0
458	51	22	No	No	No	No	Yes	No	F0
459	51	29	No	No	No	No	No	No	F0
460	50	26	No	No	Yes	No	No	No	F0
461	53	27	No	No	No	No	No	Yes	F0
462	52	22	No	No	No	No	No	No	F0
463	49	25	No	No	No	No	No	No	F0
464	49	23	No	No	No	No	No	No	F0
465	49	23	No	No	No	No	No	No	F0
466	44	21	No	No	No	No	No	No	F0
467	55	24	No	No	No	No	Yes	No	F0
468	50	24	No	No	No	No	Yes	No	F0
469	55	25	No	No	No	No	No	No	F0
470	52	20	No	No	No	No	No	No	F0
471	51	19	No	No	No	No	Yes	No	F4
472	53	24	No	No	No	No	No	No	F0
473	51	24	No	No	No	No	No	Yes	F0
474	48	28	No	No	No	No	Yes	No	F0
475	53	25	No	No	No	No	Yes	No	F3
476	49	28	No	No	No	No	Yes	No	F0
477	52	25	No	No	No	No	No	No	F0
478	53	24	No	No	No	No	No	Yes	F0
479	54	25	No	No	No	No	No	Yes	F0
480	54	26	No	Yes	No	No	No	No	F4
481	51	33	No	No	No	No	No	Yes	F0
482	44	25	No	No	No	No	No	No	F0
483	52	24	No	No	No	No	Yes	No	F0
484	55	20	No	No	No	No	No	No	F0
485	51	23	No	No	No	No	No	No	F0
486	54	29	No	No	No	No	No	No	F0
487	54	26	No	No	No	No	Yes	No	F2
488	55	22	No	No	No	No	Yes	No	F1
489	49	23	No	No	No	No	Yes	Yes	F0
490	55	25	No	No	No	No	No	No	F0
491	51	24	No	Yes	No	No	No	No	F1
492	53	27	No	No	No	No	No	Yes	F0
493	45	21	No	No	No	No	No	No	F0
494	55	22	No	No	No	No	No	No	F0
495	49	23	No	No	No	No	Yes	No	F0
496	48	26	No	No	No	Yes	Yes	Yes	F1
497	55	26	No	No	No	No	Yes	Yes	F0
498	47	24	No	No	No	No	Yes	No	F1
499	48	25	No	No	No	No	No	Yes	F0
500	51	23	No	No	No	No	Yes	No	F0
501	52	24	No	No	No	No	Yes	No	F0
502	51	26	No	No	No	No	No	No	F0
503	54	25	No	No	No	No	Yes	No	F1
504	50	27	No	No	No	No	No	No	F0
505	51	30	No	No	No	No	Yes	No	F0
506	50	26	No	No	No	No	No	No	F0
507	54	30	No	No	No	No	No	Yes	F1
508	53	24	No	No	No	No	Yes	No	F0
509	53	24	No	No	No	No	No	No	F0
510	51	24	No	No	No	No	No	No	F0
511	46	29	No	No	No	No	Yes	Yes	F0
512	54	25	No	No	No	No	No	No	F0
513	55	23	No	No	Yes	No	No	No	F0
514	49	25	No	No	No	No	Yes	No	F1
515	49	25	No	No	No	No	Yes	Yes	F0
516	52	26	No	No	No	No	No	Yes	F0
517	52	23	No	No	No	No	No	No	F0
518	51	25	No	No	No	No	No	No	F0
519	51	28	No	No	No	No	No	No	F0
520	49	22	No	No	No	No	Yes	No	F0
521	52	24	No	No	No	No	No	No	F0
522	45	26	No	No	No	Yes	Yes	No	F1
523	52	30	No	No	No	No	No	No	F0
524	49	25	No	No	No	No	Yes	Yes	F0
525	50	32	No	No	No	No	Yes	Yes	F3
526	51	24	No	No	No	No	No	No	F0
527	50	25	No	No	No	No	Yes	No	F0
528	53	27	No	No	No	No	Yes	Yes	F1
529	52	25	No	Yes	No	No	No	No	F0
530	54	24	No	No	No	No	Yes	No	F1
531	53	24	Yes	No	No	No	Yes	Yes	F1
532	51	33	No	No	No	No	Yes	Yes	F1
533	49	28	No	No	No	No	Yes	No	F1
534	51	24	No	No	No	No	Yes	No	F1
535	51	26	No	No	No	No	No	Yes	F0
536	55	25	No	No	No	No	No	No	F0
537	55	24	No	No	No	No	No	No	F0
538	47	25	No	No	No	No	No	No	F0
539	53	23	No	No	No	No	No	No	F0
540	51	27	No	No	No	No	Yes	No	F2
541	52	25	Yes	No	No	No	No	Yes	F0
542	52	24	No	No	No	No	No	No	F0
543	50	29	No	No	No	No	Yes	Yes	F0
544	47	22	No	No	No	No	No	No	F0
545	51	29	No	No	No	Yes	Yes	Yes	F1
546	50	24	No	No	No	No	Yes	No	F0
547	50	24	No	No	No	No	Yes	No	F0
548	46	25	No	No	No	No	Yes	Yes	F0
549	54	28	No	No	No	No	Yes	Yes	F1
550	45	26	No	No	No	No	Yes	No	F0
551	51	24	No	Yes	No	No	No	No	F0
552	53	29	No	No	No	No	Yes	Yes	F0
553	50	26	No	No	No	No	No	No	F0
554	45	29	No	No	No	No	Yes	No	F0
555	49	25	No	No	No	No	Yes	Yes	F0
556	49	23	No	No	No	No	No	No	F0
557	50	19	No	No	No	No	Yes	No	F0
558	54	21	No	No	No	No	No	No	F0
559	54	22	No	No	No	No	No	Yes	F0
560	50	23	No	Yes	No	No	Yes	No	F0
561	48	24	No	No	No	No	No	Yes	F0
562	47	26	No	No	No	No	Yes	No	F0
563	52	26	No	Yes	No	No	Yes	No	F1
564	48	20	No	Yes	No	Yes	No	No	F0
565	53	27	No	No	No	No	No	Yes	F0
566	55	25	No	No	No	No	No	Yes	F0
567	53	28	No	No	No	No	Yes	Yes	F0
568	52	24	No	No	No	No	No	No	F0
569	52	20	No	Yes	No	No	No	No	F1
570	44	24	No	No	No	No	No	Yes	F0
571	49	25	No	No	No	No	Yes	Yes	F0
572	51	22	No	No	No	No	Yes	No	F0
573	51	26	No	Yes	No	No	No	No	F1
574	47	23	No	No	No	No	No	No	F0
575	53	23	No	No	No	No	Yes	Yes	F0
576	44	27	No	No	No	No	Yes	No	F0
577	45	25	No	No	No	No	Yes	No	F1
578	52	31	No	No	No	No	Yes	Yes	F1
579	53	23	No	No	No	No	Yes	No	F0
580	52	24	No	No	No	No	No	Yes	F0
581	49	24	No	Yes	No	No	No	No	F0
582	53	27	No	No	No	No	Yes	Yes	F1
583	55	26	No	Yes	No	No	No	Yes	F0
584	55	22	No	No	No	No	No	No	F0
585	46	21	No	No	No	No	No	No	F0
586	50	21	No	No	No	No	No	No	F0
587	53	24	No	No	No	No	Yes	No	F0
588	51	24	No	No	No	No	No	Yes	F0
589	55	25	No	No	No	No	No	No	F0
590	45	25	No	No	No	No	Yes	No	F0
591	53	22	No	No	No	No	Yes	Yes	F0
592	53	26	No	No	No	No	No	No	F0
593	50	31	No	No	No	No	Yes	Yes	F1
594	53	24	No	No	No	No	No	No	F0
595	53	24	No	No	No	No	No	No	F0
596	51	26	No	No	No	No	No	Yes	F0
597	49	27	No	No	No	No	Yes	No	F0
598	51	24	No	Yes	No	No	Yes	No	F1
599	54	25	No	No	No	No	No	No	F0
600	46	26	No	No	No	No	No	Yes	F0
601	44	21	No	No	No	Yes	Yes	No	F0
602	54	24	No	No	No	No	Yes	Yes	F0
603	55	26	No	No	No	No	No	No	F0
604	54	25	No	No	No	No	Yes	Yes	F0
605	49	27	No	No	No	No	No	Yes	F0
606	54	27	No	No	No	No	Yes	Yes	F0
607	57	23	No	No	No	No	Yes	No	F0
608	51	25	No	No	No	No	Yes	No	F2
609	48	25	No	No	No	Yes	No	No	F0
610	51	27	No	No	No	No	Yes	No	F0
611	51	26	No	No	No	No	No	Yes	F0
612	52	30	No	No	No	No	No	Yes	F0
613	49	26	No	No	No	No	No	No	F0
614	55	24	No	No	No	No	No	Yes	F0
615	52	24	No	No	No	No	No	Yes	F0
616	54	23	No	No	No	No	No	No	F0
617	46	26	No	No	No	No	No	Yes	F0
618	47	24	No	No	No	No	Yes	No	F0
619	51	23	No	No	No	No	No	Yes	F0
620	50	23	No	No	No	No	Yes	Yes	F1
621	49	24	No	No	No	No	No	No	F0
622	52	20	No	No	No	No	Yes	No	F1
623	52	27	No	No	No	No	No	Yes	F0
624	52	27	No	No	No	No	Yes	Yes	F0
625	52	29	No	No	No	No	Yes	Yes	F2
626	49	25	No	No	No	No	Yes	Yes	F0
627	48	23	No	No	No	No	Yes	No	F0
628	51	29	No	No	No	No	Yes	No	F0
629	51	20	No	No	No	No	No	No	F0
630	47	29	No	No	No	No	Yes	No	F0
631	47	30	No	No	No	No	Yes	Yes	F1
632	53	26	No	No	No	No	No	No	F0
633	49	24	No	No	No	No	Yes	No	F0
634	49	26	No	No	No	No	No	Yes	F0
635	50	29	No	No	No	No	Yes	No	F0
636	45	23	No	No	No	No	No	No	F0
637	51	23	No	No	No	No	No	No	F0
638	55	22	No	Yes	No	No	No	No	F2
639	49	24	Yes	No	No	No	Yes	No	F0
640	51	24	No	No	No	No	No	No	F0
641	45	22	No	No	No	No	No	No	F0
642	52	24	No	No	Yes	No	No	No	F0
643	47	28	No	No	No	No	Yes	Yes	F1
644	53	26	No	No	No	No	No	No	F0
645	54	21	No	No	No	No	Yes	No	F0
646	52	26	No	No	No	No	Yes	Yes	F0
647	48	27	No	No	No	No	No	No	F0
648	48	21	No	No	No	No	Yes	No	F0
649	53	31	No	No	No	No	No	Yes	F0
650	49	23	No	No	No	No	Yes	No	F0
651	52	23	No	No	No	No	No	Yes	F0
652	48	30	No	No	No	No	No	Yes	F0
653	55	24	No	Yes	No	No	Yes	No	F0
654	54	23	No	No	No	No	No	No	F0
655	48	25	No	No	No	No	No	No	F0
656	50	27	No	No	No	No	Yes	No	F0
657	53	24	No	No	No	No	No	Yes	F0
658	51	31	No	No	No	No	No	Yes	F1
659	52	25	No	Yes	No	No	No	No	F0
660	48	31	No	No	No	No	Yes	Yes	F1
661	51	26	No	No	No	No	Yes	Yes	F1
662	52	30	No	No	No	No	Yes	Yes	F0
663	45	25	No	No	No	No	No	No	F0
664	54	29	No	No	No	No	Yes	Yes	F0
665	49	25	No	No	No	No	Yes	No	F0
666	54	25	No	No	No	No	Yes	Yes	F0
667	51	25	No	Yes	No	No	No	No	F0
668	55	24	No	No	No	No	Yes	Yes	F1
669	53	22	No	No	No	No	No	No	F0
670	55	26	No	No	No	No	No	Yes	F1
671	52	24	No	No	No	No	No	No	F0
672	47	27	No	No	No	No	No	Yes	F0
673	50	23	No	No	No	No	Yes	No	F0
674	51	27	No	No	No	No	No	Yes	F0
675	50	27	No	No	No	No	No	No	F0
676	53	22	No	No	No	No	No	No	F0
677	50	23	No	No	No	No	No	No	F0
678	46	28	No	No	No	No	Yes	No	F0
679	55	26	No	No	No	No	No	No	F0
680	53	22	No	Yes	No	No	No	No	F0
681	54	25	No	No	No	No	Yes	No	F1
682	48	31	No	No	No	No	Yes	Yes	F1
683	54	24	No	No	No	No	No	Yes	F0
684	52	24	No	No	No	No	No	No	F0
685	52	25	No	No	No	No	No	Yes	F0
686	44	26	No	No	No	No	Yes	No	F0
687	51	23	No	No	No	No	No	No	F0
688	52	19	No	No	No	No	Yes	No	F0
689	52	22	No	No	No	No	No	Yes	F0
690	52	25	No	No	No	No	Yes	Yes	F0
691	54	28	No	No	No	No	No	No	F0
692	47	21	No	No	No	No	Yes	No	F1
693	51	21	No	No	No	No	No	No	F0
694	54	27	No	No	No	No	Yes	Yes	F3
695	52	21	Yes	No	No	No	Yes	No	F0
696	50	26	No	No	No	No	No	Yes	F0
697	44	25	No	No	No	No	Yes	No	F0
698	51	25	No	No	No	No	No	No	F0
699	54	27	No	No	No	No	Yes	No	F3
700	45	24	No	No	No	No	No	Yes	F0
701	47	25	No	No	No	No	No	No	F0
702	47	28	No	No	No	No	Yes	Yes	F0
703	52	26	No	No	No	No	No	Yes	F0
704	54	29	No	No	No	No	No	Yes	F0
705	45	23	No	No	No	No	Yes	No	F0
706	51	25	No	No	No	No	Yes	Yes	F0
707	50	28	No	No	No	No	Yes	Yes	F0
708	53	28	No	No	No	No	Yes	No	F0
709	52	29	No	No	No	No	Yes	No	F4
710	52	24	No	No	No	No	No	Yes	F0
711	45	20	No	No	No	No	Yes	No	F0
712	47	24	No	No	No	Yes	No	No	F0
713	52	25	No	No	No	No	Yes	Yes	F0
714	52	16	No	No	No	No	No	No	F0
715	51	25	No	No	No	No	No	No	F0
716	46	28	No	No	No	No	No	No	F0
717	53	23	No	No	No	No	Yes	Yes	F0
718	55	26	No	No	No	No	No	Yes	F0
719	48	22	No	No	No	No	No	No	F0
720	48	30	No	No	No	No	Yes	Yes	F1
721	53	22	No	No	No	No	No	No	F0
722	49	27	No	Yes	No	No	Yes	Yes	F0
723	49	22	No	No	No	No	No	No	F0
724	47	23	No	Yes	No	No	No	No	F0
725	46	32	No	No	No	No	Yes	Yes	F0
726	49	28	No	No	No	No	No	Yes	F0
727	50	22	No	No	No	No	Yes	No	F0
728	54	22	No	No	No	No	Yes	No	F4
729	50	31	No	No	No	No	Yes	Yes	F1
730	49	31	No	Yes	No	No	Yes	Yes	F1
731	49	25	Yes	No	No	No	Yes	No	F0
732	49	27	No	No	No	No	No	Yes	F0
733	48	24	No	No	No	No	No	No	F0
734	51	27	No	No	No	No	No	Yes	F0
735	53	23	No	No	No	No	Yes	No	F0
736	48	26	No	Yes	No	No	No	Yes	F0
737	47	25	No	No	No	No	Yes	Yes	F0
738	54	28	No	No	No	No	No	Yes	F1
739	50	28	No	No	No	No	Yes	Yes	F1
740	48	24	No	No	No	No	Yes	No	F0
741	51	27	No	No	No	No	Yes	No	F0
742	49	31	No	Yes	No	No	No	Yes	F1
743	51	30	No	No	No	No	Yes	Yes	F1
744	45	27	No	No	No	No	Yes	No	F0
745	53	27	No	No	No	No	Yes	Yes	F1
746	50	27	No	No	No	Yes	Yes	No	F0
747	49	24	No	No	No	Yes	Yes	No	F0
748	50	21	No	No	No	No	Yes	No	F0
749	48	28	No	Yes	No	No	No	No	F0
750	53	26	No	No	No	No	Yes	Yes	F2
751	52	24	Yes	No	No	No	Yes	No	F0
752	52	24	No	No	No	No	Yes	No	F0
753	48	26	No	No	No	No	No	Yes	F0
754	53	25	No	No	No	No	Yes	Yes	F1
755	54	26	No	No	No	No	No	No	F0
756	47	21	No	No	No	No	Yes	No	F0
757	49	24	No	No	No	No	No	No	F0
758	45	24	No	Yes	No	No	No	No	F0
759	52	26	No	No	No	No	Yes	Yes	F1
760	52	23	No	No	No	No	Yes	Yes	F1
761	55	25	No	No	No	No	No	No	F0
762	53	22	No	No	No	No	No	No	F0
763	53	24	No	No	No	No	No	Yes	F0
764	50	25	No	No	No	No	Yes	No	F0
765	49	26	No	No	No	No	No	Yes	F0
766	51	18	No	No	No	No	No	No	F0
767	52	21	No	No	No	No	No	No	F0
768	47	23	No	No	No	No	No	Yes	F1
769	52	22	No	No	No	No	No	No	F0
770	55	23	No	No	No	No	Yes	No	F0
771	49	25	No	No	No	No	Yes	No	F0
772	52	26	No	No	No	No	Yes	Yes	F0
773	54	26	No	No	No	No	Yes	Yes	F0
774	51	21	No	No	No	No	No	No	F0
775	51	20	No	No	Yes	No	No	No	F1
776	50	26	No	No	No	No	Yes	Yes	F0
777	49	26	No	No	No	No	No	Yes	F0
778	49	20	No	No	No	No	No	No	F0
779	44	26	No	No	No	No	No	No	F0
780	48	25	No	No	No	No	Yes	No	F0
781	48	21	No	No	No	No	Yes	No	F1
782	53	27	No	No	No	No	Yes	No	F0
783	49	24	No	No	No	No	No	No	F0
784	53	25	No	No	No	No	Yes	No	F0
785	46	22	No	No	No	No	No	Yes	F0
786	48	23	No	No	No	No	Yes	No	F0
787	50	25	No	No	No	No	Yes	Yes	F1
788	51	29	No	No	No	No	Yes	No	F1
789	49	20	No	No	No	No	No	No	F0
790	48	27	No	No	No	No	Yes	No	F0
791	51	25	No	No	No	No	No	No	F0
792	48	24	No	No	No	Yes	Yes	No	F0
793	50	28	No	No	No	No	Yes	Yes	F0
794	47	21	No	Yes	No	No	No	No	F1
795	51	23	No	No	No	No	No	No	F0
796	55	24	No	No	No	No	No	Yes	F0
797	48	26	No	No	No	No	Yes	No	F3
798	54	23	Yes	No	No	No	No	Yes	F0
799	51	24	No	No	No	No	Yes	Yes	F0
800	51	22	No	Yes	No	No	No	Yes	F0
801	50	25	No	No	No	No	No	No	F0
802	54	23	No	No	No	No	No	Yes	F0
803	55	31	Yes	Yes	No	No	No	Yes	F2
804	57	24	No	No	No	No	No	No	F0
805	53	25	No	No	No	No	No	No	F0
806	52	23	No	No	No	No	Yes	Yes	F0
807	51	23	No	No	No	No	Yes	No	F0
808	48	21	No	No	No	No	Yes	No	F0
809	53	22	No	Yes	No	No	No	No	F0
810	55	23	No	No	No	No	Yes	No	F0
811	51	24	No	No	No	No	No	Yes	F0
812	51	29	No	No	No	No	Yes	Yes	F1
813	52	24	No	No	No	No	Yes	No	F1
814	53	32	No	No	No	No	No	Yes	F1
815	54	28	No	No	No	No	No	Yes	F1
816	51	23	No	No	No	No	No	No	F0
817	50	27	No	No	No	No	No	Yes	F0
818	47	29	No	No	No	No	Yes	Yes	F0
819	47	26	No	No	No	No	No	Yes	F0
820	51	23	No	No	No	No	Yes	No	F0
821	49	25	No	No	No	No	Yes	No	F0
822	51	25	No	No	No	No	Yes	Yes	F0
823	44	27	No	No	No	No	No	No	F0
824	47	26	No	No	No	No	Yes	Yes	F1
825	51	26	No	No	No	No	No	No	F0
826	51	27	No	No	No	No	Yes	Yes	F1
827	50	23	No	No	No	No	Yes	No	F0
828	45	24	No	No	No	No	Yes	No	F0
829	52	23	No	No	No	No	No	No	F0
830	51	21	No	No	No	No	No	No	F0
831	49	24	No	No	No	Yes	Yes	No	F0
832	52	25	No	No	No	No	No	No	F0
833	52	26	No	No	No	No	No	No	F0
834	49	24	No	No	No	No	Yes	No	F0
835	52	24	No	No	No	No	Yes	Yes	F1
836	46	26	No	No	No	No	Yes	No	F0
837	51	27	No	No	No	No	Yes	No	F0
838	54	24	No	No	No	No	No	No	F0
839	48	30	No	No	No	No	Yes	Yes	F1
840	48	23	No	No	No	No	Yes	No	F2
841	54	21	No	No	No	No	No	No	F0
842	48	30	No	No	No	No	Yes	Yes	F0
843	49	23	No	No	No	No	No	No	F0
844	55	24	No	No	No	No	No	Yes	F0
845	48	24	No	No	No	No	Yes	No	F0
846	48	25	No	No	No	No	Yes	Yes	F0
847	49	24	No	No	No	No	Yes	No	F0
848	49	24	No	No	No	No	Yes	No	F0
849	49	24	No	No	No	No	No	No	F0
850	46	24	No	No	No	No	Yes	No	F0
851	53	25	No	No	No	No	Yes	No	F0
852	52	23	No	No	No	No	No	No	F0
853	51	27	No	No	No	No	No	Yes	F0
854	51	26	No	No	No	Yes	Yes	Yes	F0
855	50	25	No	No	No	No	No	No	F0
856	54	21	No	No	No	No	No	No	F0
857	49	24	No	No	No	No	No	Yes	F0
858	51	26	No	No	No	No	Yes	Yes	F1
859	50	26	No	No	No	No	No	Yes	F0
860	53	23	No	No	No	No	Yes	No	F1
861	52	27	No	No	No	No	Yes	No	F0
862	49	22	No	No	No	No	No	No	F0
863	45	22	No	Yes	No	No	Yes	Yes	F0
864	50	23	No	No	No	No	Yes	No	F2
865	49	22	No	Yes	No	No	Yes	No	F0
866	51	26	No	No	No	No	Yes	Yes	F2
867	49	21	No	No	No	No	Yes	No	F0
868	47	21	No	No	No	No	No	No	F0
869	51	26	No	No	No	No	No	Yes	F0
870	52	29	No	No	No	No	Yes	Yes	F0
871	45	24	No	No	No	No	Yes	No	F0
872	48	27	No	No	No	No	Yes	No	F0
873	45	25	No	Yes	No	No	No	No	F1
874	53	28	No	No	No	No	Yes	Yes	F0
875	48	30	No	No	No	No	Yes	No	F0
876	47	27	No	No	No	No	Yes	No	F0
877	50	26	No	Yes	No	No	Yes	No	F0
878	52	25	No	No	No	No	Yes	Yes	F0
879	47	24	No	No	No	No	No	No	F0
880	56	22	No	No	No	No	No	No	F0
881	52	31	No	No	No	No	No	Yes	F0
882	47	30	No	No	No	No	Yes	Yes	F0
883	48	24	No	No	No	Yes	Yes	Yes	F0
884	45	25	No	No	No	No	Yes	No	F0
885	51	28	No	No	No	No	Yes	Yes	F0
886	54	24	No	No	No	No	No	No	F0
887	51	28	No	No	No	No	No	No	F0
888	50	29	No	No	No	No	Yes	Yes	F0
889	54	24	No	No	No	No	Yes	Yes	F0
890	52	29	No	No	No	No	No	Yes	F0
891	51	28	No	No	No	No	No	Yes	F0
892	49	35	No	No	No	No	Yes	No	F2
893	54	28	No	No	No	No	Yes	No	F0
894	52	26	No	No	No	No	Yes	Yes	F0
895	46	27	No	No	No	No	Yes	Yes	F0
896	45	22	No	No	No	No	No	No	F0
897	51	30	No	No	No	No	Yes	Yes	F0
898	52	25	No	No	No	No	No	No	F0
899	52	24	No	No	No	No	No	No	F0
900	54	23	No	No	No	Yes	Yes	Yes	F2
901	46	24	No	Yes	No	No	No	No	F0
902	47	22	No	No	No	No	No	No	F0
903	49	24	No	No	No	No	No	No	F0
904	51	22	No	No	No	No	No	No	F0
905	51	20	No	No	No	No	No	No	F0
906	49	24	No	No	No	No	No	No	F0
907	53	21	No	No	No	No	No	No	F0
908	52	20	No	Yes	No	No	No	No	F0
909	51	24	No	No	No	No	Yes	No	F0
910	49	24	No	No	No	No	No	No	F0
911	54	26	No	No	No	No	No	No	F0
912	48	28	No	No	No	No	Yes	Yes	F0
913	51	29	No	No	No	No	No	Yes	F0
914	46	27	No	No	No	No	No	Yes	F0
915	46	23	No	No	No	No	No	No	F0
916	55	25	No	No	Yes	No	No	No	F1
917	51	29	No	No	No	Yes	Yes	Yes	F1
918	50	24	No	No	No	No	Yes	No	F0
919	50	24	No	No	No	No	No	Yes	F0
920	46	23	No	No	No	No	Yes	Yes	F0
921	52	20	No	No	No	No	Yes	No	F1
922	49	24	No	No	No	No	Yes	No	F0
923	54	26	No	No	No	No	No	Yes	F0
924	55	21	No	No	No	No	Yes	No	F1
925	54	25	No	No	No	No	Yes	Yes	F0
926	54	21	No	No	No	No	No	No	F0
927	51	24	No	No	No	No	Yes	No	F0
928	53	26	No	No	No	No	Yes	Yes	F1
929	43	30	No	No	No	No	Yes	Yes	F3
930	51	25	No	Yes	No	No	Yes	No	F1
931	52	26	No	No	No	No	Yes	No	F0
932	53	25	No	No	No	No	Yes	Yes	F0
933	53	28	No	No	No	No	Yes	No	F0
934	54	22	No	No	No	No	No	No	F0
935	52	25	No	Yes	No	No	Yes	Yes	F1
936	55	22	No	No	No	No	No	No	F0
937	50	23	No	No	No	No	No	No	F0
938	54	25	No	No	No	No	Yes	No	F0
939	52	25	No	No	No	No	No	No	F0
940	50	24	No	No	No	No	No	No	F0
941	52	25	No	No	No	No	No	Yes	F0
942	53	24	No	No	No	No	No	No	F0
943	50	26	No	No	No	No	No	No	F0
944	48	23	No	No	No	No	Yes	No	F0
945	54	24	No	No	Yes	No	No	No	F0
946	53	29	No	No	No	No	Yes	Yes	F1
947	50	21	No	No	No	No	No	No	F0
948	47	23	No	No	No	No	No	Yes	F0
949	49	21	No	No	No	No	Yes	No	F1
950	51	23	No	No	No	No	Yes	Yes	F3
951	43	23	No	No	No	No	Yes	No	F0
952	53	23	No	No	No	No	No	Yes	F0
